# Supplementary material for: Co-delivery of simvastatin and demineralized bone matrix hierarchically from nanosheet-based supramolecular hydrogels for osteogenesis
Source: Royal Society of Chemistry journal article supplement (doi:10.1039/d1tb01256h), 2021-01-01
Supplement: d1tb01256h1.pdf [file d1tb01256h1.pdf]

# Supporting Information

## Co-delivery of Simvastatin and Demineralized Bone Matrix Hierarchically from Nanosheet-based Supramolecular Hydrogels for Osteogenesis

Xiao Zhang<sup>\*†ab</sup>, Jiabing Fan<sup>†b</sup>, Chen Chen<sup>b</sup>, Tara Aghaloo<sup>d</sup>, Min Lee<sup>\*bc</sup>

---

<sup>a.</sup> Department of Pharmacy, Second Clinical Medical College, Shanxi Medical University, Taiyuan, Shanxi 030001, P.R.China.

<sup>b.</sup> Division of Advanced Prosthodontics, University of California at Los Angeles, 10833 Le Conte Avenue, Los Angeles, California 90095, United States.

<sup>c.</sup> Department of Bioengineering, University of California at Los Angeles, 420 Westwood Plaza, Los Angeles, California 90095, United States.

<sup>d.</sup> Division of Diagnostic and Surgical Sciences, University of California at Los Angeles, 10833 Le Conte Avenue, Los Angeles, California 90095, United States

† These authors contribute equally to this paper.

\* Corresponding author.

E-mail address: xiao.zhang1@hotmail.com (X. Zhang); leemin@ucla.edu (M. Lee).

## Figures

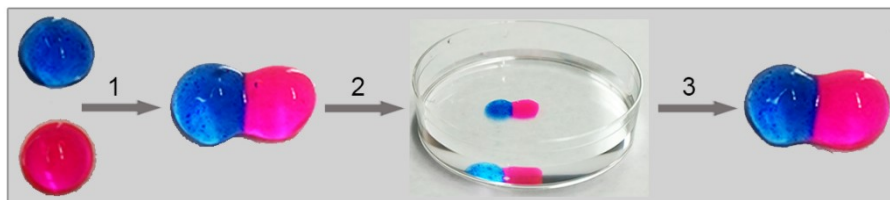

**Figure S1.** Self-healing of two SNHs after attachment directly: (1) red hydrogel and blue hydrogel were attached directly; (2) the new hydrogel was immersed into deionized water for 10 min; (3) the hydrogel was transferred from deionized water and maintained its shape.

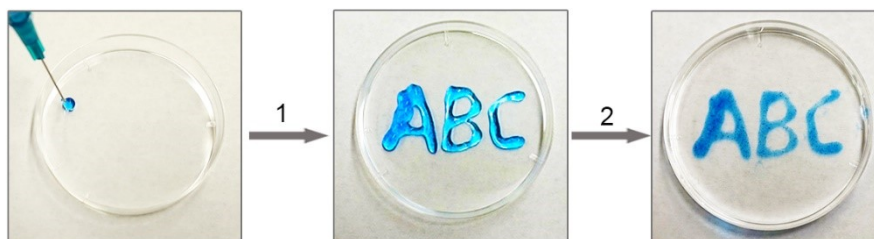

**Figure S2.** "ABC" gel could be formed after injection from the 23 G needle.

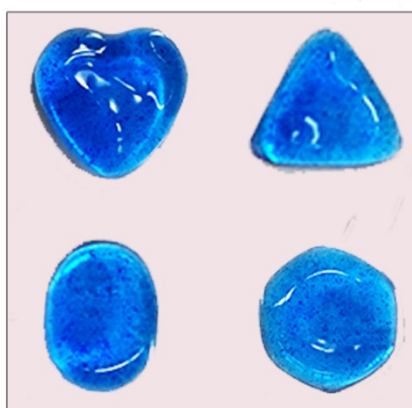

**Figure S3.** Hydrogels of different shapes could be obtained after injection from the 23 G needle.

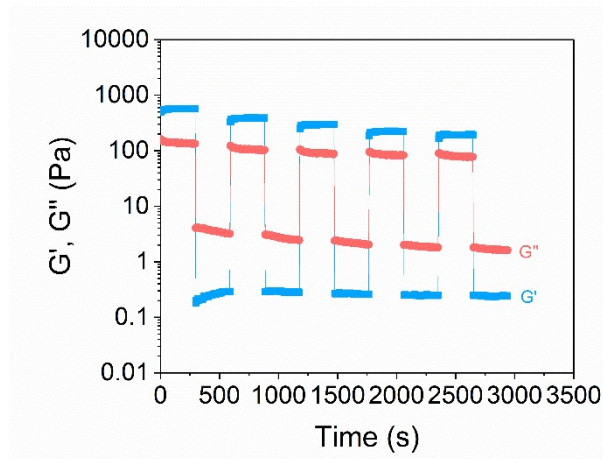

**Figure S4.**  $G'$  and  $G''$  values of hydrogels consisting of 3.0% SL, 0.1% ASAP and 0.5% GC binder when alternate step strain switched from small strain ( $\gamma = 1.0\%$ ) to large strain ( $\gamma = 300\%$ ).

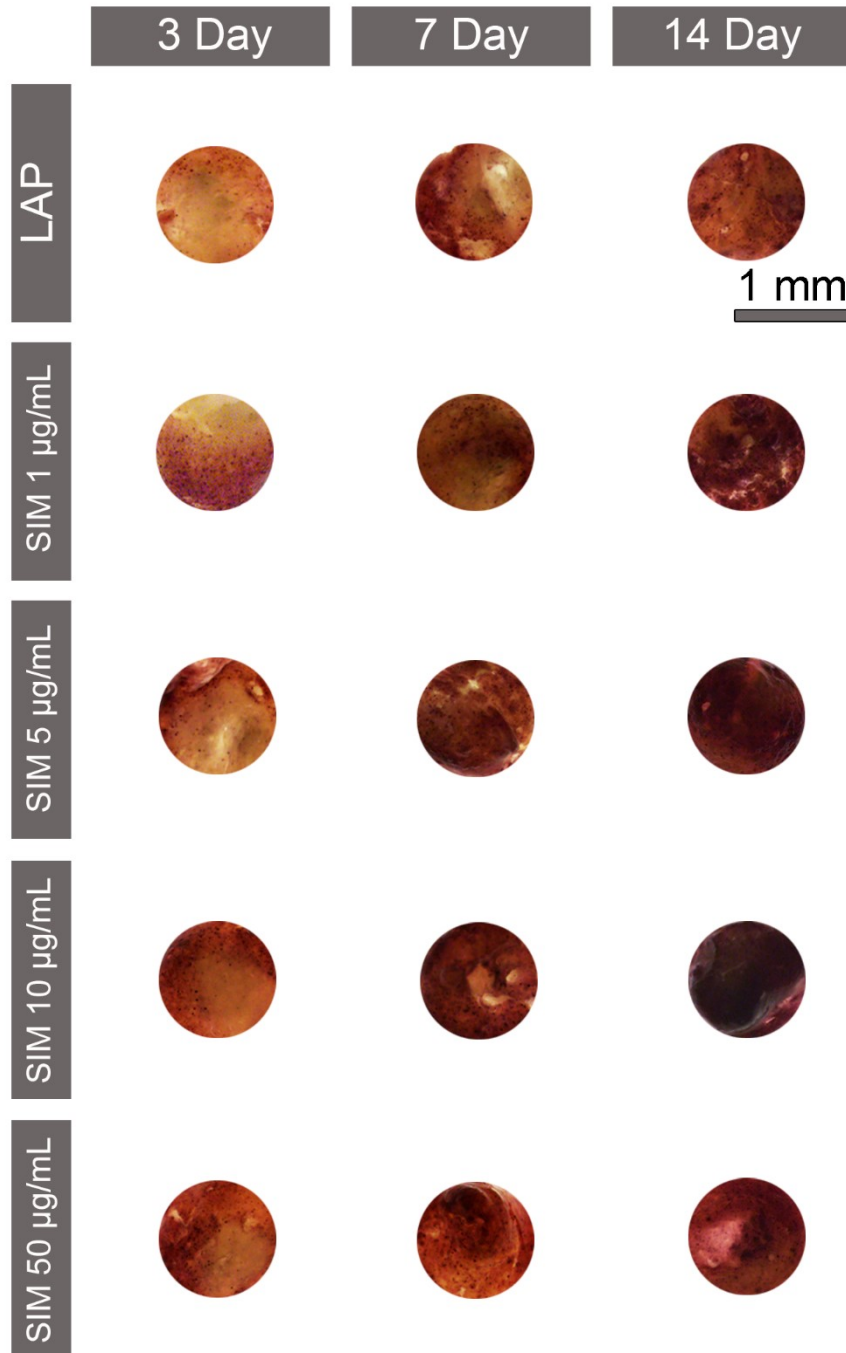

**Figure S5.** ALP expression of SNHs containing SIM from 0 to 50  $\mu\text{g}/\text{mL}$  after incubation in osteogenic medium at day 3, 7, or 14. Scar bar represents 1 mm.

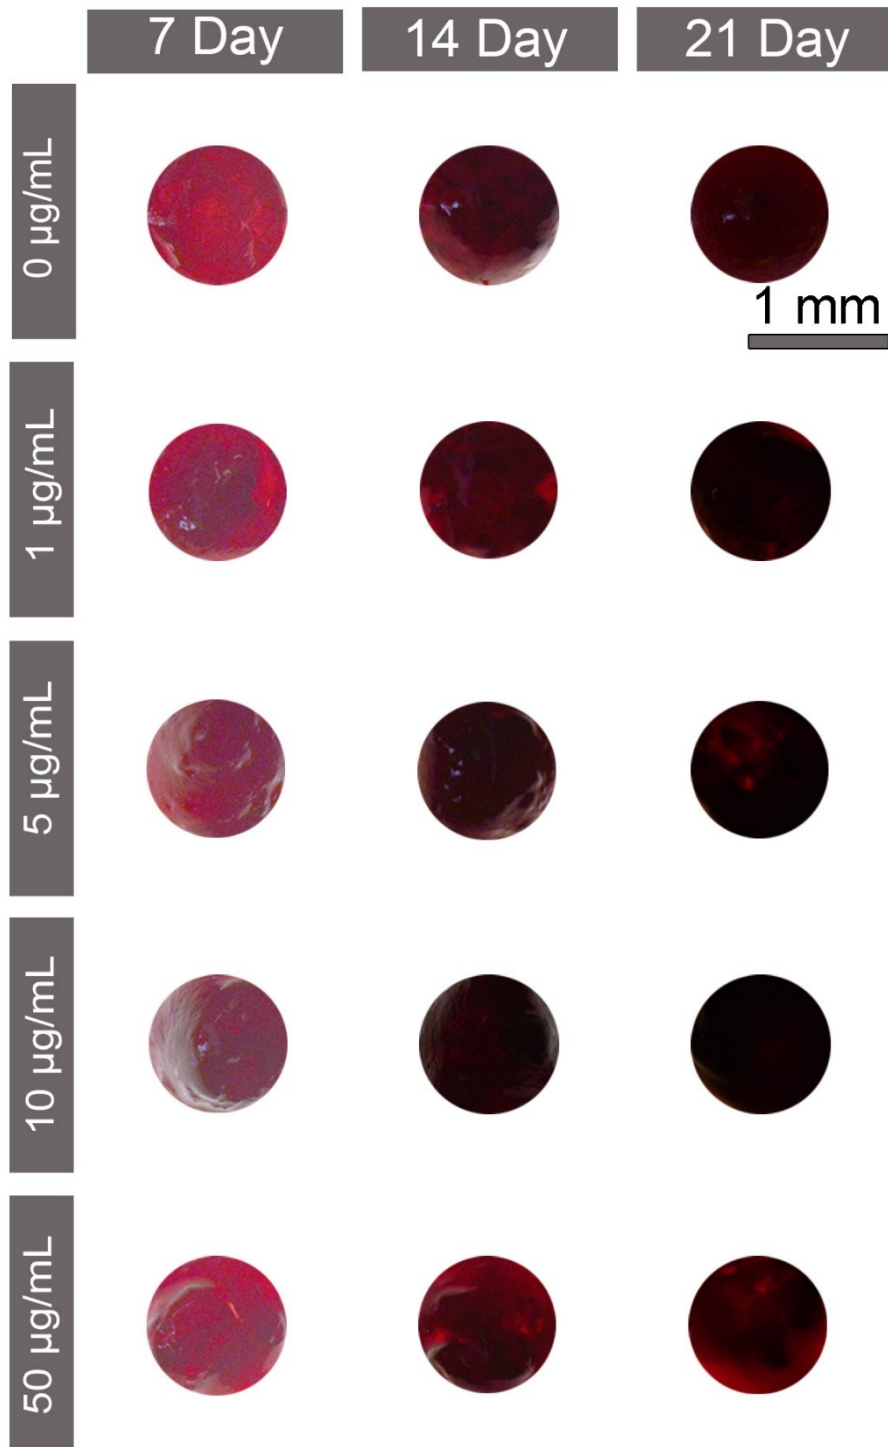

**Figure S6.** Mineralization of SNHs containing SIM from 0 to 50 µg/mL after incubation in osteogenic medium at day 7, 14, or 21. Scar bar represents 1 mm.

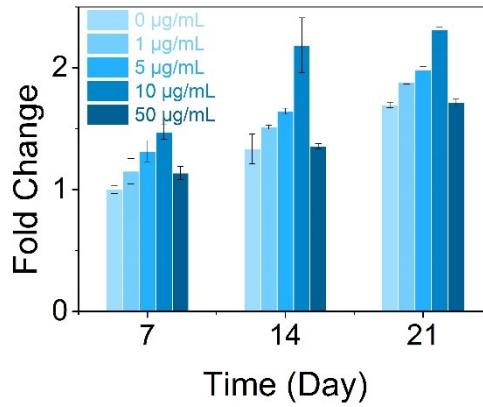

**Figure S7.** Quantification of mineralization for SNHs containing SIM from 0 to 50 µg/mL after incubation in osteogenic medium at day 7, 14, or 21 (n=3).

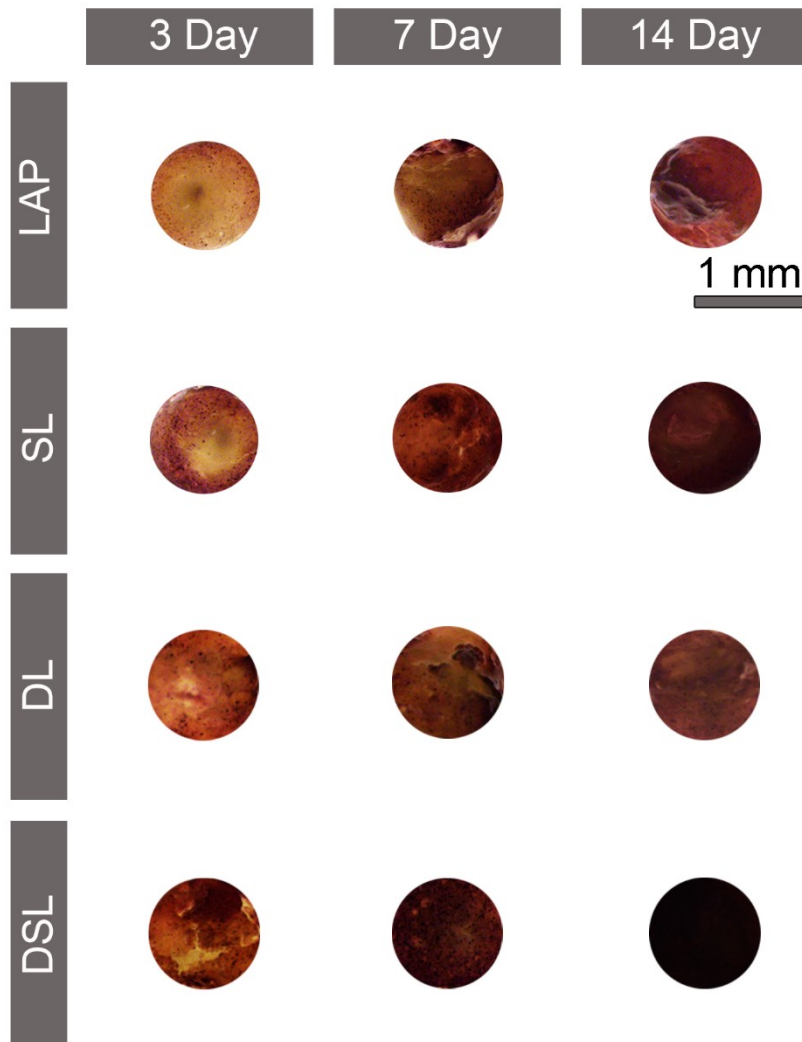

**Figure S8.** ALP expression of NHs, SNHs, DNHs and DSNHs after incubation in osteogenic medium at day 3, 7, or 14. Scar bar represents 1 mm.

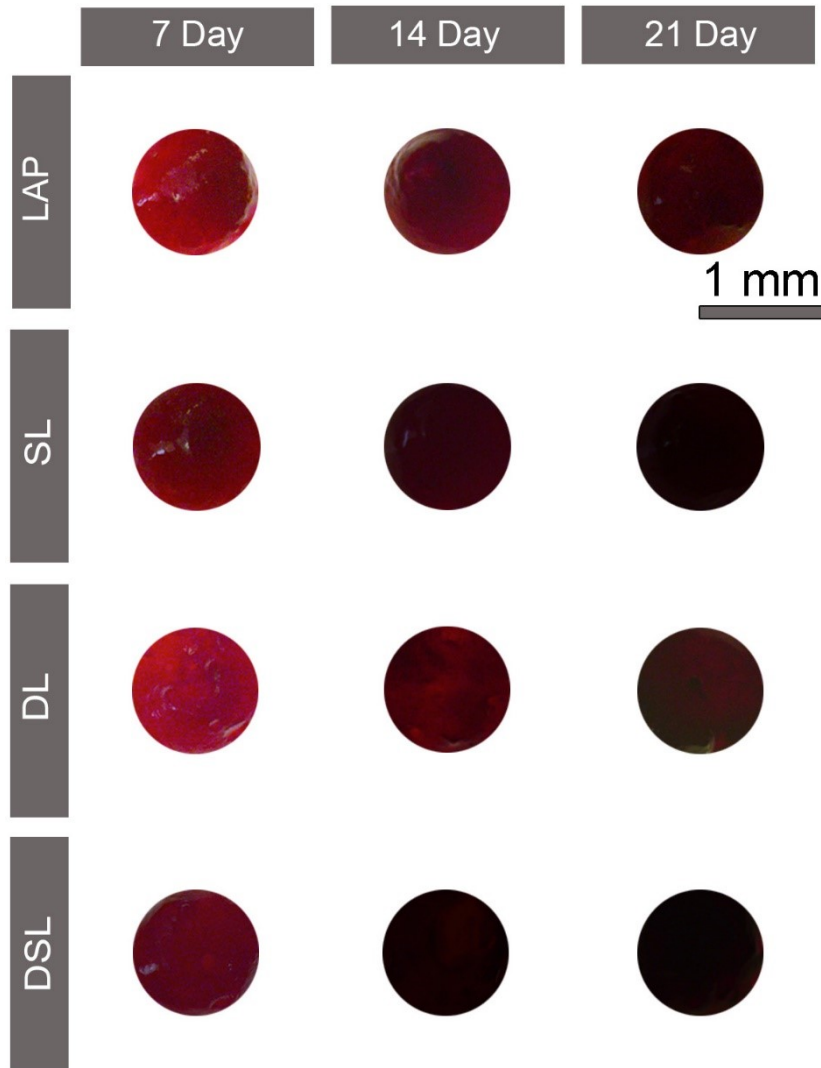

**Figure S9.** Mineralization of NHs, SNHs, DNHs and DSNHs after incubation in osteogenic medium at day 3, 7, or 14. Scar bar represents 1 mm.

## Tables

**Table S1.** Sequences of primers for qPCR assay.

| <b>Primers</b> | <b>Forward</b>         | <b>Reverse</b>          |
|----------------|------------------------|-------------------------|
| GAPDH          | AGGTCGGTGTGAACGGATTTG  | TGTAGACCATGTAGTTGAGGTCA |
| ALP            | GTTGCCAAGCTGGGAAGAACAC | CCCACCCCGCTATTCCAAAC    |
| Runx2          | CGGTCTCCTTCCAGGATGGT   | GCTTCCGTCAGCGTCAACA     |
| OPN            | GGGGACTATGCACCTGAGC    | GACTGTGCGAAATGGGCTACCT  |
| OCN            | GGGAGACAACAGGGAGGAAAC  | CAGGCTTCCTGCCAGTACCT    |
| BMP-2          | GGGACCCGCTGTCTTCTAGT   | TCAACTCAAATTCGCTGAGGAC  |
